# Supplementary material for: Significant sparse polygenic risk scores across 813 traits in UK Biobank
Source: PLoS Genet. 2022 Mar 24;18(3):e1010105. doi: 10.1371/journal.pgen.1010105 (PMC8946745; doi:10.1371/journal.pgen.1010105)
Supplement: S2 Table — For each ancestry group in UK Biobank, the number of individuals (n), age (mean and standard deviation [sd]), sex (percentage of individuals in male), the fraction of individuals genotyped on the UK Biobank Axiom Array. The statistics for the white British ancestry group were shown for the 70% training set, 10% validation set, and 20% test set. (XLSX) [file pgen.1010105.s005.xlsx]

## Sheet: S2
Ancestry group	Split	n	Age		sex	Array
			mean	sd	male	UK Biobank Axiom Array
white British	training	235991	57.4409	7.99699	0.463374	0.890534
white British	validation	33713	57.508	7.94229	0.468128	0.891763
white British	test	67425	57.5011	7.99755	0.459355	0.887979
non-British white	N/A	24905	55.8646	8.32206	0.424814	0.899659
African	N/A	6497	52.5293	8.07665	0.428967	1
South Asian	N/A	7831	54.0781	8.51421	0.547823	1
East Asian	N/A	1704	52.7222	7.61963	0.353286	1
Total	N/A	378066	57.1784	8.07722	0.461203	0.895431
